# Supplementary material for: Piezo-phototronic effect regulated broadband photoresponse of a-Ga2O3/ZnO heterojunction
Source: Royal Society of Chemistry journal article supplement (doi:10.1039/d3nr00744h), 2023-01-01
Supplement: d3nr00744h1.pdf [file d3nr00744h1.pdf]

## Supporting Information

### **Piezo-phototronic effect regulated broadband photoresponse of a-Ga<sub>2</sub>O<sub>3</sub>/ZnO heterojunction**

Jiantao Wang,<sup>a</sup> Yan Zhou,<sup>a</sup> Zihan Wang,<sup>a</sup> Boying Wang,<sup>a</sup> Yongqiu Li,<sup>a</sup> Banghao Wu,<sup>a</sup> Chunlin Hao,<sup>a</sup> Yaju Zhang,<sup>\*a</sup> Haiwu Zheng<sup>\*a</sup>

<sup>a</sup> *Henan Province Engineering Research Center of Smart Micro-nano Sensing Technology and Application, School of Physics and Electronics, Henan University, Kaifeng 475004, P. R. China.*

*\*Correspondence to: Y. J. Zhang (40070002@vip.henu.edu.cn), H. W. Zheng (zhenghaiw@ustc.edu).*

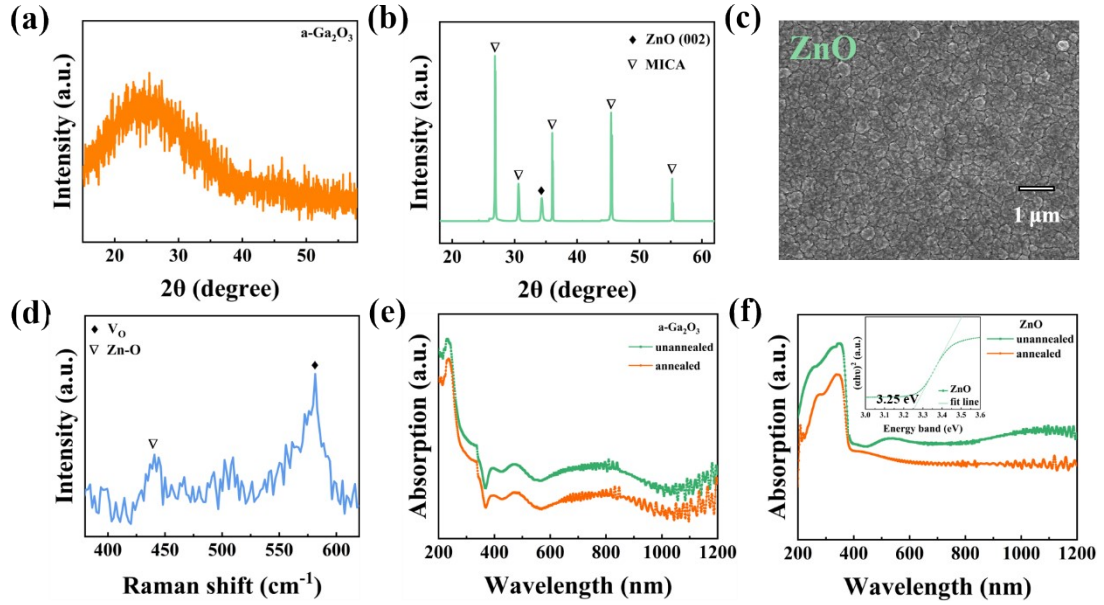

**Fig. S1** XRD patterns of (a) a-Ga<sub>2</sub>O<sub>3</sub> and (b) ZnO films. (c) The top view SEM image of the ZnO film. (d) Room-temperature Raman spectrum of ZnO film. (e) The absorption spectra of as-grown (unannealed) Ga<sub>2</sub>O<sub>3</sub> and annealed sample. (f) The absorption spectra of as-grown (unannealed) ZnO and annealed sample.

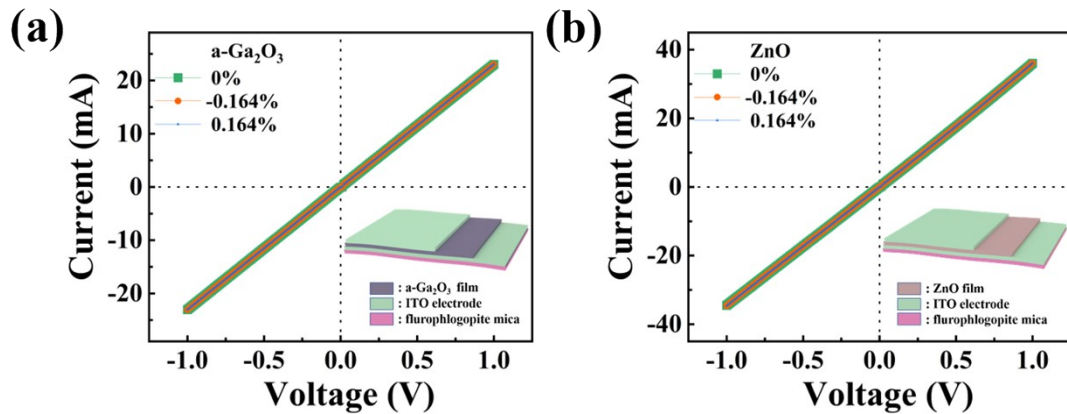

**Fig. S2** The dark *J-V* curves of the (a) a-Ga<sub>2</sub>O<sub>3</sub> and (b) ZnO films under different strains. The insets are the schematics of the devices.

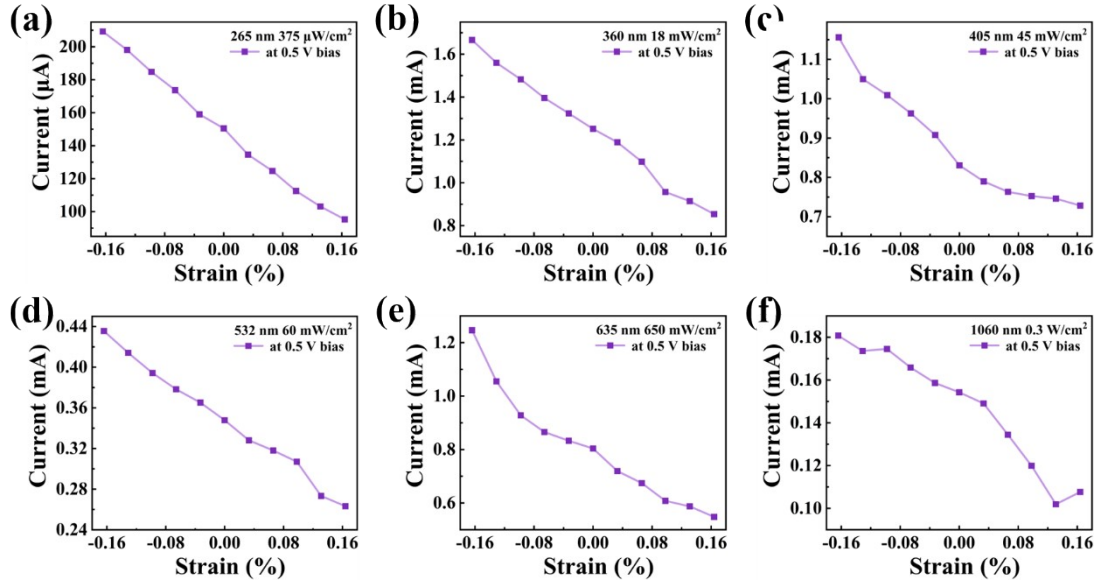

**Fig. S3** The output photocurrent as a function of strain state under (a) 265, (b) 360, (c) 405, (d) 532, (e) 635, (f) 1060 nm illumination and 0.5 V bias

Table S1. A comparison of photoresponse properties for various Ga<sub>2</sub>O<sub>3</sub> or ZnO-based heterojunction

| Materials and structure                               | Bias [V] | Wavelength [nm] | R [A/W]               | D* [Jones]            | Refs      |
|-------------------------------------------------------|----------|-----------------|-----------------------|-----------------------|-----------|
| Ga <sub>2</sub> O <sub>3</sub> /ZnO                   | 0.5      | 265             | 7.27                  | 2.83×10 <sup>11</sup> | This work |
|                                                       |          | 360             | 2.10                  | 8.16×10 <sup>10</sup> |           |
|                                                       |          | 405             | 0.542                 | 2.11×10 <sup>10</sup> |           |
|                                                       |          | 532             | 0.150                 | 5.84×10 <sup>9</sup>  |           |
|                                                       |          | 635             | 36.2×10 <sup>-3</sup> | 1.41×10 <sup>9</sup>  |           |
|                                                       |          | 1060            | 9.49×10 <sup>-3</sup> | 3.69×10 <sup>8</sup>  |           |
| Ga <sub>2</sub> O <sub>3</sub> /ZnO                   | 20       | 254             | 2.49                  | 2.75×10 <sup>13</sup> | 1         |
|                                                       |          | 365             | 0.27                  | 1.97×10 <sup>12</sup> |           |
| Ga <sub>2</sub> O <sub>3</sub> /ZnO                   | 0        | 266             | 7.97×10 <sup>-3</sup> | 1.16×10 <sup>11</sup> | 2         |
| (TmGa) <sub>2</sub> O <sub>3</sub> /Au                | 10       | 240             | 0.447                 | 2.26×10 <sup>12</sup> | 3         |
| ZnO/Ga <sub>2</sub> O <sub>3</sub>                    | 0        | 251             | 9.7×10 <sup>-3</sup>  | 6.29×10 <sup>12</sup> | 4         |
| CH <sub>3</sub> NH <sub>3</sub> PbI <sub>3</sub> /ZnO | 1        | 380             | 4.00                  | 1.74×10 <sup>9</sup>  | 5         |
|                                                       |          | 760             | 0.75                  | 3.27×10 <sup>8</sup>  |           |

photodetectors.

### Note S1: Calculation method of the strain values.

When an  $h_1$ -thick film on an  $h_2$ -thick substrate is bent to a radius  $r$  under external strain, the bending strain can be expressed as follow:<sup>6</sup>

$$\delta_{\max} \approx \left( \frac{h_1 + h_2}{r} \right)$$

In our study, the range of bending strain applied to a-Ga<sub>2</sub>O<sub>3</sub>/ZnO heterojunction is calculated from 0.164% to -0.164%, which respectively represents the maximum tensile strain and compressive strain.

### Note S2: The $I$ - $V$ curves of ZnO and a-Ga<sub>2</sub>O<sub>3</sub> based devices under different strains.

To expound whether piezoresistive effect or piezotronic effect plays a dominant role in the a-Ga<sub>2</sub>O<sub>3</sub>/ZnO film heterojunction when external strains are applied, two pairs of ITO electrodes are deposited onto the a-Ga<sub>2</sub>O<sub>3</sub> and ZnO film, respectively. The schematic structures of ITO/ZnO/ITO and ITO/a-Ga<sub>2</sub>O<sub>3</sub>/ITO devices are displayed in the inset of Fig. S2a and S2b, respectively. The almost linear dark  $I$ - $V$  curves of the devices under different strains indicate that the ITO electrodes form Ohmic contacts with both a-Ga<sub>2</sub>O<sub>3</sub> and ZnO film, and the piezoresistive effects have little impact on the resistance of the device from -0.164% compressive strain to 0.164% tensile strain. Therefore, the strain regulating  $J$ - $V$  curves presented in Fig. 1(d) is mainly due to the effective adjustment by the piezoelectric polarization charges generated at the a-Ga<sub>2</sub>O<sub>3</sub>/ZnO hetero-interface.

### References

1. H. Wang, J. Ma, L. Cong, H. Zhou, P. Li, L. Fei, B. Li, H. Xu, and Y. Liu, *Mater. Today Phys.* 2021, **20**, 100464.
2. D. Ni, Y. Wang, A. Li, L. Huang, H. Tang, B. Liu, and C. Cheng, *Nanoscale* 2022, **14**, 3159.
3. Q. Qu, Q. Liu, L. Chen, Y. Li, H. Pan, J. Chen, M. Li, Y. Lu, and Y. He, *Appl. Phys. Lett.* 2022, **120**, 122108 (2022).
4. B. Zhao, F. Wang, H. Chen, L. Zheng, L. Su, D. Zhao, and X. Fang, *Adv. Funct. Mater.* 2017, **27**, 1700264.
5. T. Gao, Q. Zhang, J. Chen, X. Xiong, and T. Zhai, *Adv. Opt. Mater.* 2017, **5**, 1700206.
6. Y. Yang, G. Yuan, Z. Yan, Y. Wang, X. Lu, and J. M. Liu, *Adv. Mater.* 2017, **29**, 1700425.
